# Supplementary material for: A bis(germylene) functionalized metal-coordinated polyphosphide and its isomerization
Source: Royal Society of Chemistry journal article supplement (doi:10.1039/d0cc03920a), 2020-01-01
Supplement: d0cc03920a1.pdf [file d0cc03920a1.pdf]

Supporting Information

## A bis(germylene) functionalized metal-coordinated polyphosphide and its isomerization

Ravi Yadav,<sup>a</sup> Bhupendra Goswami,<sup>a</sup> Thomas Simler,<sup>a</sup> Christoph Schoo,<sup>a</sup> Stephan Reichl,<sup>b</sup> Manfred Scheer,<sup>b</sup> and Peter W. Roesky\*<sup>a</sup>

<sup>a</sup> *Institute of Inorganic Chemistry, Karlsruhe Institute of Technology (KIT), Engesserstraße 15, 76131 Karlsruhe (Germany).*

<sup>b</sup> *Institute of Inorganic Chemistry, University of Regensburg, Universitätsstraße 31, 93040 Regensburg (Germany)*

Email: [roesky@kit.edu](mailto:roesky@kit.edu)

### Contents

|                                                                                                                             |     |
|-----------------------------------------------------------------------------------------------------------------------------|-----|
| 1. Experimental Section .....                                                                                               | S2  |
| 1.1. General Methods .....                                                                                                  | S2  |
| 1.2. Synthesis and analytical data .....                                                                                    | S2  |
| 1.2.1. Synthesis of <b>1</b> [(LGe) <sub>2</sub> {(μ,η <sup>4</sup> -P <sub>5</sub> )FeCp*}] .....                          | S2  |
| 1.2.2. Isomerization of <b>1</b> to <b>2</b> , [(LGe){(μ,η <sup>3</sup> -P <sub>5</sub> )(η <sup>1</sup> -GeL)FeCp*}] ..... | S4  |
| 2. NMR Spectra .....                                                                                                        | S5  |
| 3. Isomerization of complex <b>1</b> to <b>2</b> .....                                                                      | S8  |
| 4. Details of the simulation of the NMR spectra .....                                                                       | S11 |
| 4.1 Experimental and simulated spectra of <b>1</b> at 298 K .....                                                           | S11 |
| 4.2 Experimental and simulated spectra of <b>2</b> at 298 K .....                                                           | S14 |
| 5. IR Spectrum of <b>1</b> .....                                                                                            | S17 |
| 6. Single crystal X-ray diffraction .....                                                                                   | S18 |
| 6.1. Table S3: Crystal data and structure refinement .....                                                                  | S19 |
| 6.2. Crystal structures .....                                                                                               | S20 |
| 7. References .....                                                                                                         | S22 |

# 1. Experimental Section

## 1.1. General Methods

All the manipulations of air- and water-sensitive reactions were performed with rigorous exclusion of oxygen and moisture in flame-dried Schlenk-type glassware either on a dual manifold Schlenk line, interfaced to a high vacuum ( $10^{-3}$  torr) line (Figure S1) or in an argon-filled MBraun glove box. Hexane was distilled under nitrogen from potassium benzophenoneketyl before storage *in vacuo* over  $\text{LiAlH}_4$ . Toluene, diethylether, and *n*-pentane were dried by using an MBraun solvent purification system (SPS 800), degassed and stored *in vacuo* over  $\text{LiAlH}_4$ . Elemental analyses were carried out with an Elementar vario Micro cube. IR spectra were obtained on a Bruker Tensor 37 spectrometer equipped with a room temperature DLATGS detector and a diamond ATR (attenuated total reflection) unit.  $^1\text{H}$ ,  $^{13}\text{C}\{^1\text{H}\}$ , and  $^{31}\text{P}\{^1\text{H}\}$  NMR spectra were recorded on a Bruker Avance III 400 ( $^1\text{H}$ : 400.30 MHz,  $^{13}\text{C}$ : 100.67 MHz,  $^{31}\text{P}$ : 162.04 MHz) or on a Bruker Avance III 300 ( $^1\text{H}$ : 300.13 MHz,  $^{13}\text{C}$ : 75.48 MHz,  $^{31}\text{P}$ : 121.50 MHz). The chemical shifts are reported in ppm relative to external TMS ( $^1\text{H}$ ,  $^{13}\text{C}$ ) and  $\text{H}_3\text{PO}_4$  (85%) ( $^{31}\text{P}$ ). The designation of spin systems in the  $^{31}\text{P}\{^1\text{H}\}$  NMR spectra was performed by convention.  $[\text{Cp}^*\text{Fe}(\eta^5\text{-P}_5)]$ ,<sup>1</sup>  $[\text{K}(\text{dme})]_2[\text{Cp}^*\text{Fe}(\eta^5\text{-P}_5)]$ ,<sup>2</sup>  $[\text{LGeCl}]$  ( $\text{L} = \text{PhC}(\text{NtBu})_2$ ),<sup>3</sup> and  $[\text{LGe-GeL}]^3$  were synthesized according to literature procedures.

## 1.2. Synthesis and analytical data

### 1.2.1. Synthesis of **1** $[(\text{LGe})_2\{\mu, \eta^4\text{-P}_5\}\text{FeCp}^*]$

**Method A:** Using a high-vacuum line, toluene (*ca.* 10 mL) was transferred under vacuum from a solvent storage flask and condensed over a mixture of  $[\text{LGe-GeL}]$  (150 mg, 0.246 mmol) and  $[\text{Cp}^*\text{Fe}(\eta^5\text{-P}_5)]$  (85 mg, 0.246 mmol) (see Figure S1 for the reaction setup) at  $-78$  °C. The reaction mixture was allowed to warm to room temperature over 30 minutes. All the volatiles were removed under vacuum after further stirring the reaction mixture for 30 minutes at room temperature. The residue was extracted with hexane (20 mL) and filtered. The filtrate was concentrated till incipient crystallization (overall workup time 2-3 hours) and subsequently stored at  $-30$  °C for one day to obtain orange-coloured crystals of complex **1**. The crystals were separated from the mother liquor by decantation and dried *in vacuo*. (Yield: 70 mg, 0.146 mmol, 60%).

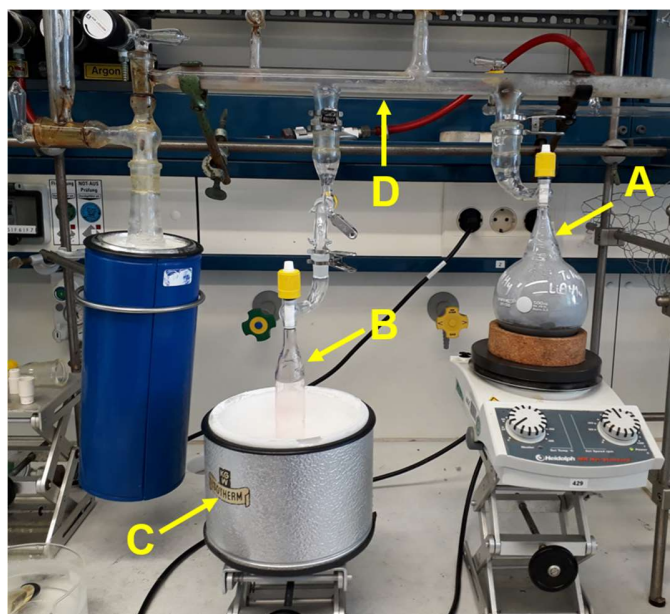

**Figure S1:** Reaction set-up for transfer of toluene under vacuum. A) toluene stored *in vacuo* over  $\text{LiAlH}_4$ , B) resealable reaction flask under vacuum, C) low temperature ( $-78\text{ }^\circ\text{C}$ ) bath, D) high vacuum ( $10^{-3}$  torr) line.

**Method B:**  $[\text{K}(\text{dme})]_2[\text{Cp}^*\text{Fe}(\eta^5\text{-P}_5)]$  (181.3 mg, 0.3 mmol) was dissolved in dme and cooled to  $-50\text{ }^\circ\text{C}$ . To this, a solution of  $[\text{LGeCl}]$  (203.7 mg, 0.6 mmol) in 10 mL dme pre-cooled at  $-50\text{ }^\circ\text{C}$  was added. An immediate change in colour from dark green to brown/reddish was observed and a colourless solid was formed. The reaction mixture was allowed to reach room temperature within three hours and stirred for another 10 minutes at room temperature. All the volatiles were removed *in vacuo*. A dark red solution could be extracted with 3 x 10 mL of *n*-hexane and filtered over diatomaceous earth. The complex **1** was obtained as a dark red powder by slow evaporation of the solvent under reduced pressure (overall workup time: two to three hours). (Yield: 250.0 mg, 0.26 mmol, 87%).

Anal Calcd. for  $\text{C}_{40}\text{H}_{61}\text{N}_4\text{P}_5\text{Ge}_2\text{Fe}$  (953.93): C, 50.36; H, 6.45; N, 5.87. Found: C, 49.62; H, 6.18; N, 5.60.

$^1\text{H NMR}$  (400 MHz, 298 K,  $\text{C}_6\text{D}_6$ ):  $\delta$  [ppm] = 1.23 (s, 18 H,  $\text{C}(\text{CH}_3)_3$ ), 1.32 (s, 18 H,  $\text{C}(\text{CH}_3)_3$ ), 1.90 (s, 15 H,  $\text{C}(\text{CH}_3)$ ), 6.89-7.02 (m, 6 H, *H*-Ph), 7.20 (t, 2 H, *H*-Ph,  $^3J_{\text{HH}} = 7.2$  Hz), 7.65 (d, 1 H, *H*-Ph,  $^3J_{\text{HH}} = 6.5$  Hz), 8.68 (d, 1 H, *H*-Ph,  $^3J_{\text{HH}} = 7.2$  Hz).

$^{31}\text{P}\{^1\text{H}\}$  NMR (162 MHz, 298 K,  $\text{C}_6\text{D}_6$ ): (AMM'XX') spin system  $\delta$  [ppm] = -45.7 (m, 2 P,  $\text{P}_{\text{XX}'}$ ), 43.5 (m, 2 P,  $\text{P}_{\text{MM}}$ ), 150.5 (m, 1 P,  $\text{P}_A$ ) (See Section 4.1).

**$^{13}\text{C}\{^1\text{H}\}$  NMR** (100 MHz, 298 K,  $\text{C}_6\text{D}_6$ ):  $\delta$  [ppm] = 11.9 (C( $\text{CH}_3$ )), 32.3 (C( $\text{CH}_3$ )<sub>3</sub>), 32.6 (C( $\text{CH}_3$ )<sub>3</sub>), 53.5 (C( $\text{CH}_3$ )<sub>3</sub>), 54.4 (C( $\text{CH}_3$ )<sub>3</sub>), 89.8 (C( $\text{CH}_3$ )), 127.0 (C-Ph), 129.6 (C-Ph), 129.7 (C-Ph), 131.2 (C-Ph), 135.5 (C-Ph), 136.4 (C-Ph), signals for NCN could not be detected and recording the  $^{13}\text{C}\{^1\text{H}\}$  NMR spectrum with large numbers of scans *i.e.* during longer measurement times led to low quality spectra because of the isomerization product starting to appear.

**IR (ATR):**  $\tilde{\nu}$  ( $\text{cm}^{-1}$ ) = 2973 (s), 2960 (m), 2925 (m), 2900 (s), 2863 (s), 1646 (s), 1602 (s), 1578 (s), 1516 (s), 1474 (m), 1455 (m), 1412 (vs), 1389 (s), 1372 (s), 1359 (s), 1252 (s), 1221 (m), 1202 (s), 1177 (m), 1158 (m), 1140 (w), 1069 (m), 1063 (m), 1031 (m), 1019 (s), 925 (w), 898 (w), 849 (w), 791 (s), 741 (s), 706 (vs), 615 (w), 581 (m), 558 (w), 500 (w), 477 (m), 440 (m).

### 1.2.2. Isomerization of **1** to **2**, [(LGe){( $\mu$ , $\eta^3$ -P<sub>5</sub>)( $\eta^1$ -GeL)FeCp\*}]

The isomerization of complex **1** to **2** was monitored by  $^1\text{H}$  NMR spectroscopy (Section 3). In solution, complex **1** slowly isomerizes to complex **2** at room temperature *via* a 1,2-migration of one [LGe]<sup>+</sup> moiety and subsequent coordination to the [Cp\*Fe]<sup>+</sup> moiety. Despite several attempts, analytically pure complex **2** could not be isolated due to two main reasons: i) if the NMR scale reaction is carried out at room temperature, full conversion of complex **1** to complex **2** is impossible in a reasonable time scale (more than one month) (Section 3); ii) upon heating the reaction mixture to increase the rate of the reaction (40 °C for 24 h or 60 °C for 3 h), thermal decomposition is observed, resulting in a mixture of [Cp\*Fe( $\eta^5$ -P<sub>5</sub>)], **1**, **2**, and an unidentified product (Section 3). In addition, when the reaction is performed on a preparative scale, [LGe-GeL] (75 mg, 0.123 mmol) and [Cp\*Fe( $\eta^5$ -P<sub>5</sub>)] (42 mg, 0.123 mmol) in toluene at 40 °C for 24 h or 60 °C for 3 h, followed by filtration and slow evaporation of toluene, a mixture of brown (**2**), orange (**1**), and green ([Cp\*Fe( $\eta^5$ -P<sub>5</sub>)]) coloured crystals were obtained along with an unidentified red-brown amorphous solid. However, a few brown-coloured crystals of complex **2** could be manually separated from the mixture for NMR and X-ray diffraction studies. Furthermore, isolated crystals of complex **1** (50 mg) were heated at 40 °C for 24 h in toluene and the reaction mixture also showed a mixture of **1**, **2**, [Cp\*Fe( $\eta^5$ -P<sub>5</sub>)], and unidentified products according to the NMR results.

**$^1\text{H}$  NMR** (400 MHz, 298 K,  $\text{C}_6\text{D}_6$ ):  $\delta$  [ppm] = 1.10 (s, 9 H, C( $\text{CH}_3$ )<sub>3</sub>), 1.11 (s, 9 H, C( $\text{CH}_3$ )<sub>3</sub>), 1.43 (s, 9 H, C( $\text{CH}_3$ )<sub>3</sub>), 1.52 (s, 9 H, C( $\text{CH}_3$ )<sub>3</sub>), 1.91 (s, 15 H, C( $\text{CH}_3$ )), 6.81-6.97 (m, 8 H, *H*-Ph), 7.06 (br, 1 H, *H*-Ph), 7.12 (br, 1 H, *H*-Ph).

**$^{31}\text{P}\{^1\text{H}\}$  NMR** (162 MHz, 298 K,  $\text{C}_6\text{D}_6$ ):  $\delta$  [ppm] = -43.0 (m, 1 P), -6.8 (m, 1 P), 72.4 (m, 1 P), 90.4 (m, 1 P), 252.5 (m, 1 P) (Details in section 4.2).

## 2. NMR Spectra

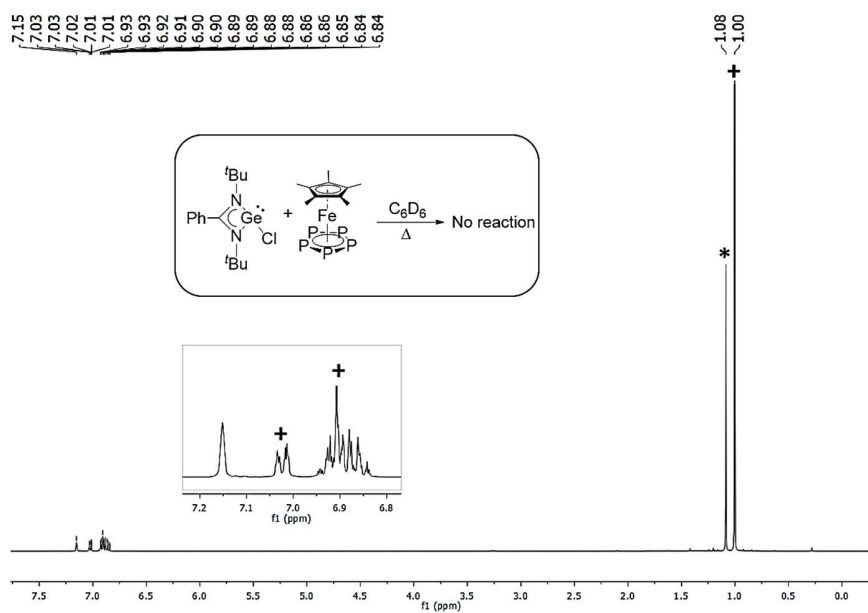

**Figure S2:**  $^1\text{H}$  NMR (400 MHz, 298 K,  $\text{C}_6\text{D}_6$ ) spectrum of the reaction mixture between LGCl (+) and  $[\text{Cp}^*\text{Fe}(\eta^5\text{-P}_5)]$  (\*).

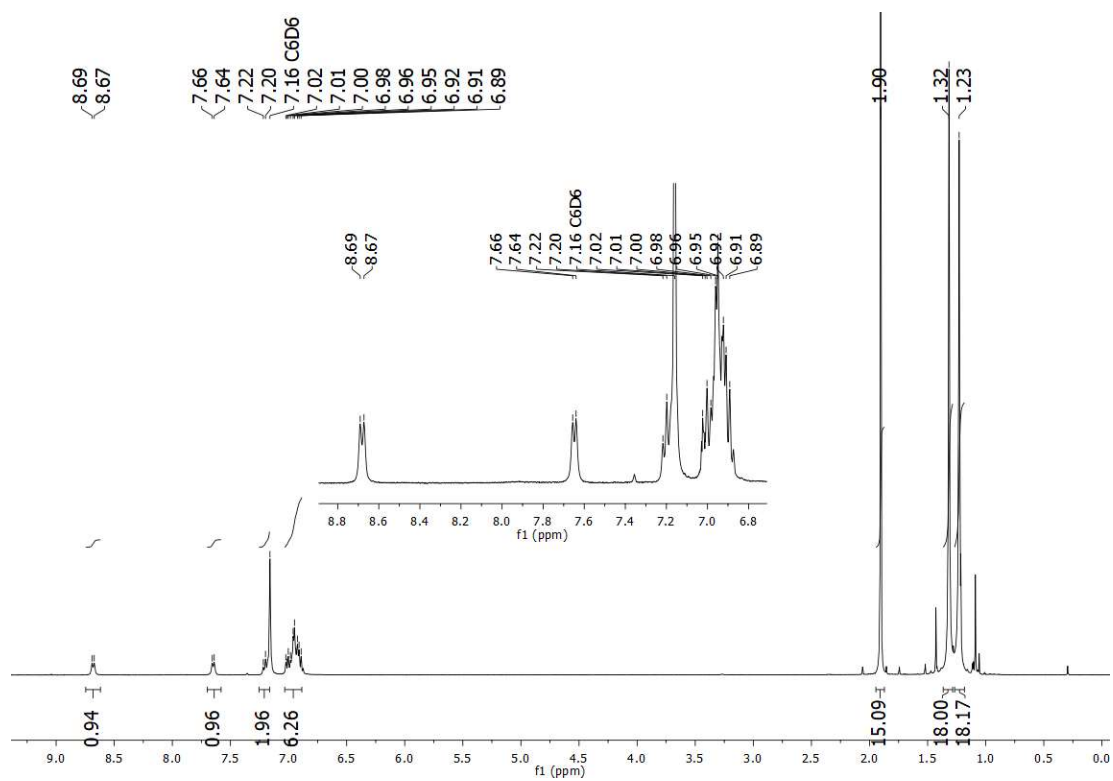

**Figure S3:**  $^1\text{H}$  NMR (400 MHz, 298 K,  $\text{C}_6\text{D}_6$ ) spectrum of complex 1.

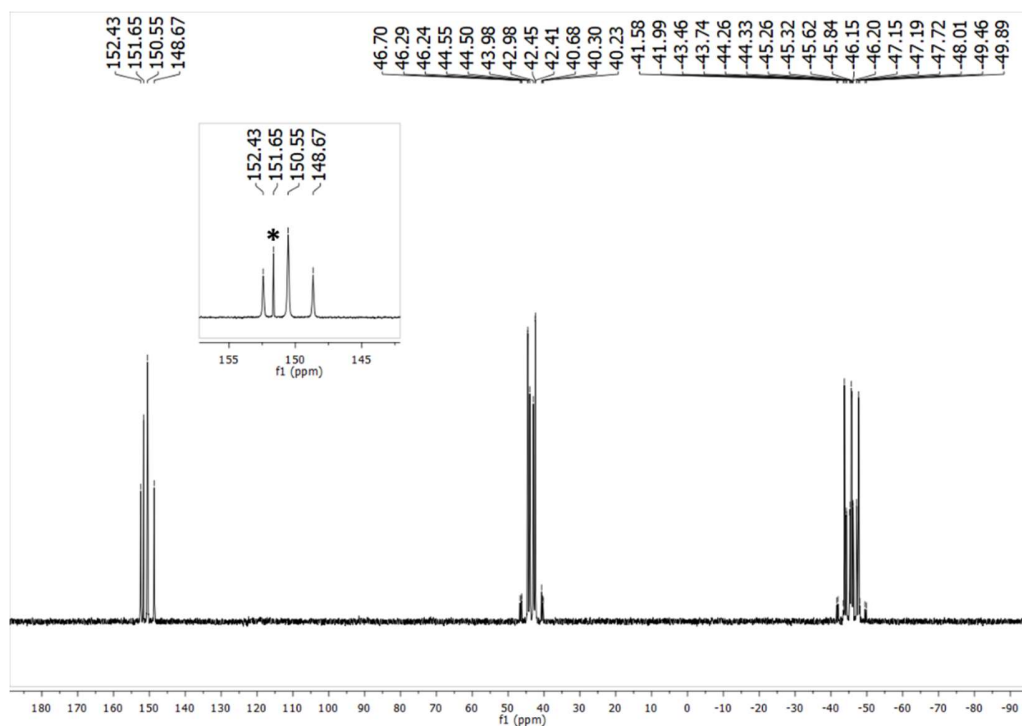

**Figure S4:**  $^{31}\text{P}\{^1\text{H}\}$  NMR (162 MHz, 298 K,  $\text{C}_6\text{D}_6$ ) spectrum of complex **1**; \* = traces of  $[\text{Cp}^*\text{Fe}(\eta^5\text{-P}_5)]$ .

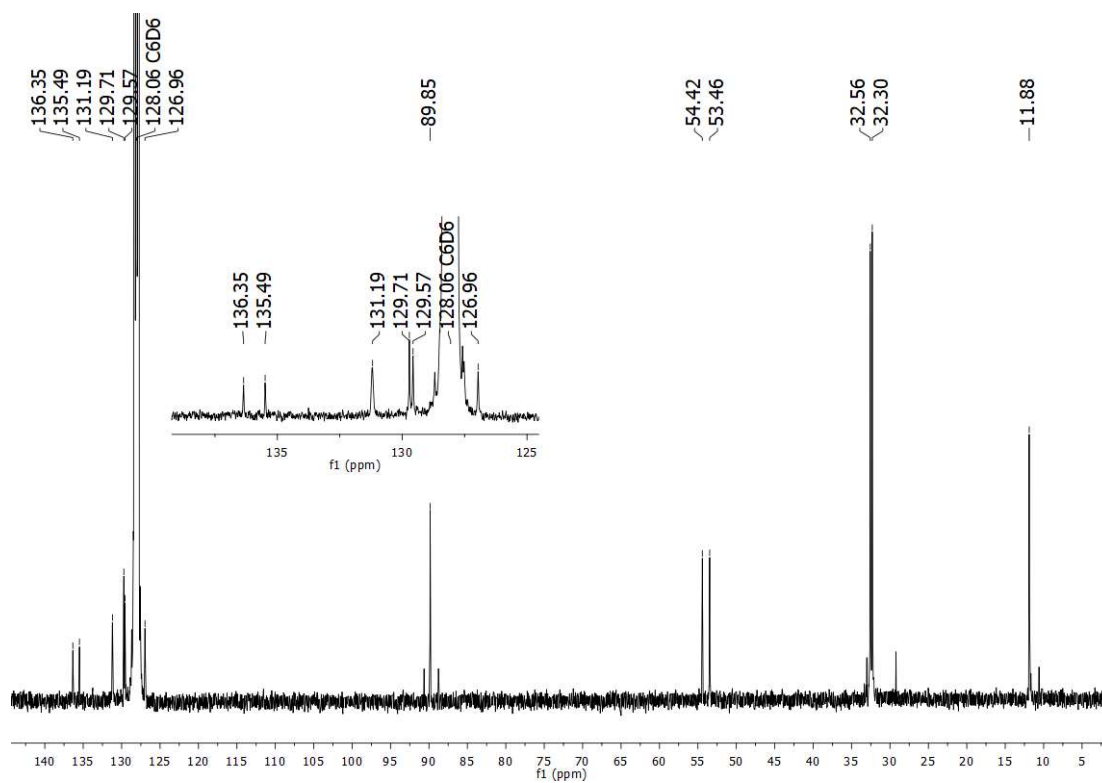

**Figure S5:**  $^{13}\text{C}\{^1\text{H}\}$  NMR (100 MHz, 298 K,  $\text{C}_6\text{D}_6$ ) spectrum of complex **1**.

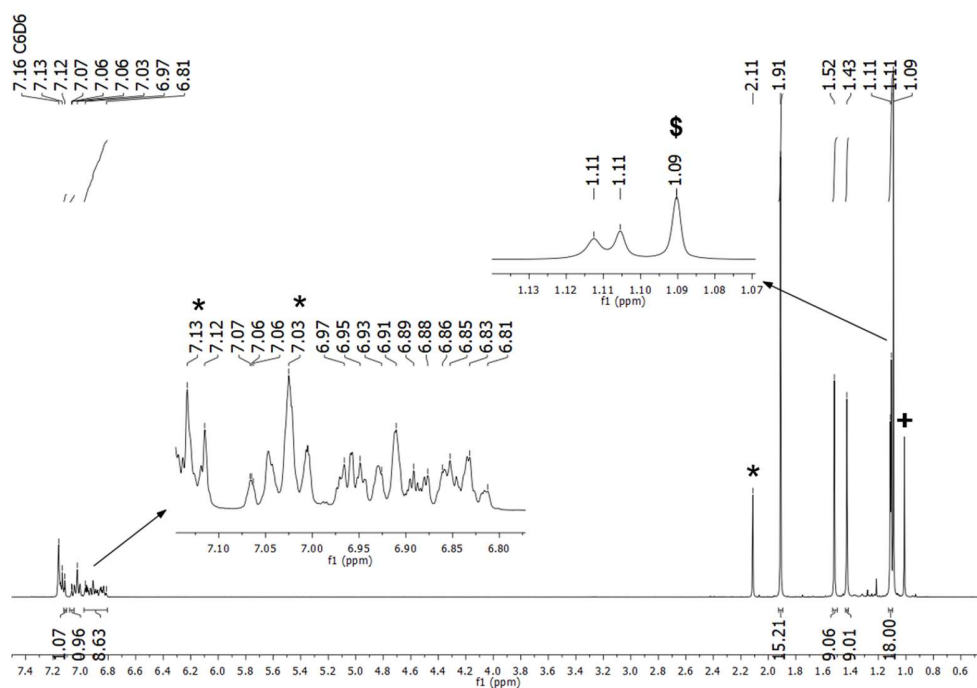

**Figure S6:** <sup>1</sup>H NMR (400 MHz, 298 K, C<sub>6</sub>D<sub>6</sub>) spectrum of complex **2**. A few crystals were manually separated to obtain the spectrum. + = grease, \$ = [Cp\*Fe(η<sup>5</sup>-P<sub>5</sub>)], \* = toluene.

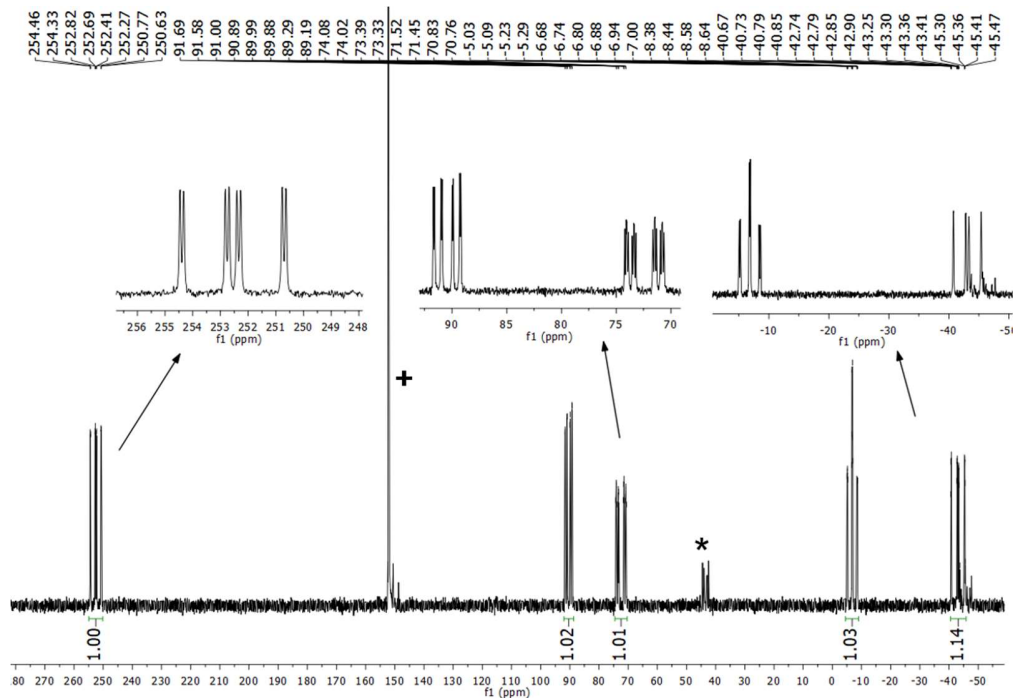

**Figure S7:** <sup>31</sup>P{<sup>1</sup>H} NMR (162 MHz, 298 K, C<sub>6</sub>D<sub>6</sub>) spectrum of complex **2**. A few crystals were manually separated to obtain the spectrum. + = [Cp\*Fe(η<sup>5</sup>-P<sub>5</sub>)], \* = traces of complex **1**.

### 3. Isomerization of complex 1 to 2

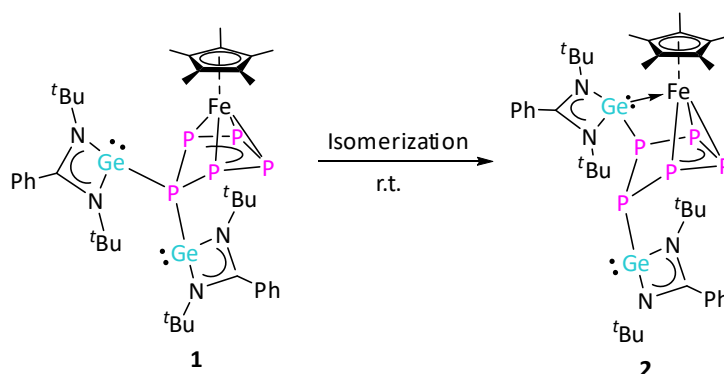

**Scheme S1:** NMR monitoring of the isomerization of complex **1** to complex **2** at room temperature.

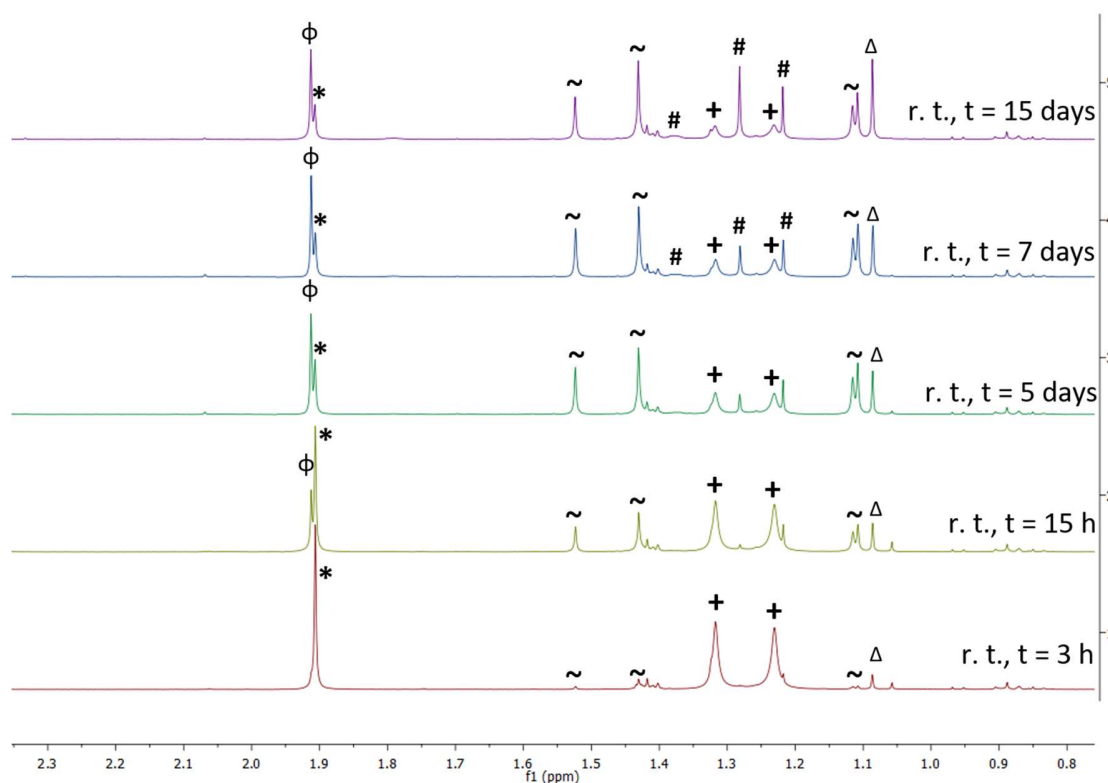

**Figure S8:** Stacked  $^1\text{H}$  NMR (400 MHz, 298 K,  $\text{C}_6\text{D}_6$ ) spectra of the aliphatic region for the conversion of isolated complex **1** to complex **2**. + =  $^t\text{Bu}$  group of **1**, \* =  $\text{Cp}^*$  group of **1**, ~ =  $^t\text{Bu}$  group of **2**,  $\phi$  =  $\text{Cp}^*$  group of **2**,  $\Delta$  =  $[\text{Cp}^*\text{Fe}(\eta^5\text{-P}_5)]$  and # = unidentified product(s).



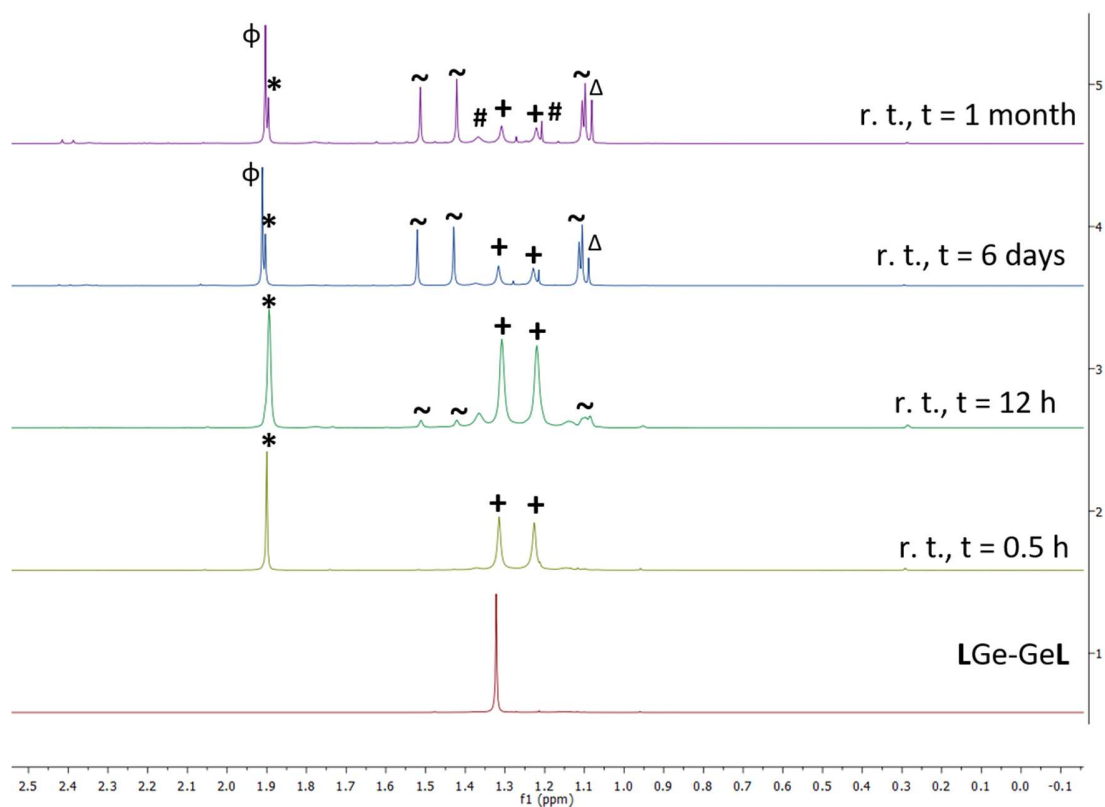

**Figure S9:** Stacked  $^1\text{H}$  NMR (400 MHz, 298 K,  $\text{C}_6\text{D}_6$ ) spectra of the aliphatic region for the formation of complex **1** and its subsequent conversion to complex **2**. Part 1 of the picture shows the  $t\text{Bu}$  signal of [LGe-GeL]. + =  $t\text{Bu}$  group of **1**, \* =  $\text{Cp}^*$  group of **1**, ~ =  $t\text{Bu}$  group of **2**,  $\phi$  =  $\text{Cp}^*$  group of **2**,  $\Delta$  =  $[\text{Cp}^*\text{Fe}(\eta^5\text{-P}_5)]$  and # = unidentified product(s).

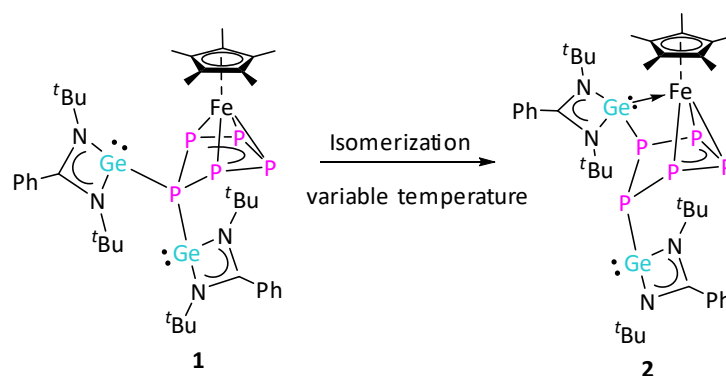

**Scheme S2:** NMR monitoring of isomerization of complex **1** to complex **2** at variable temperatures.

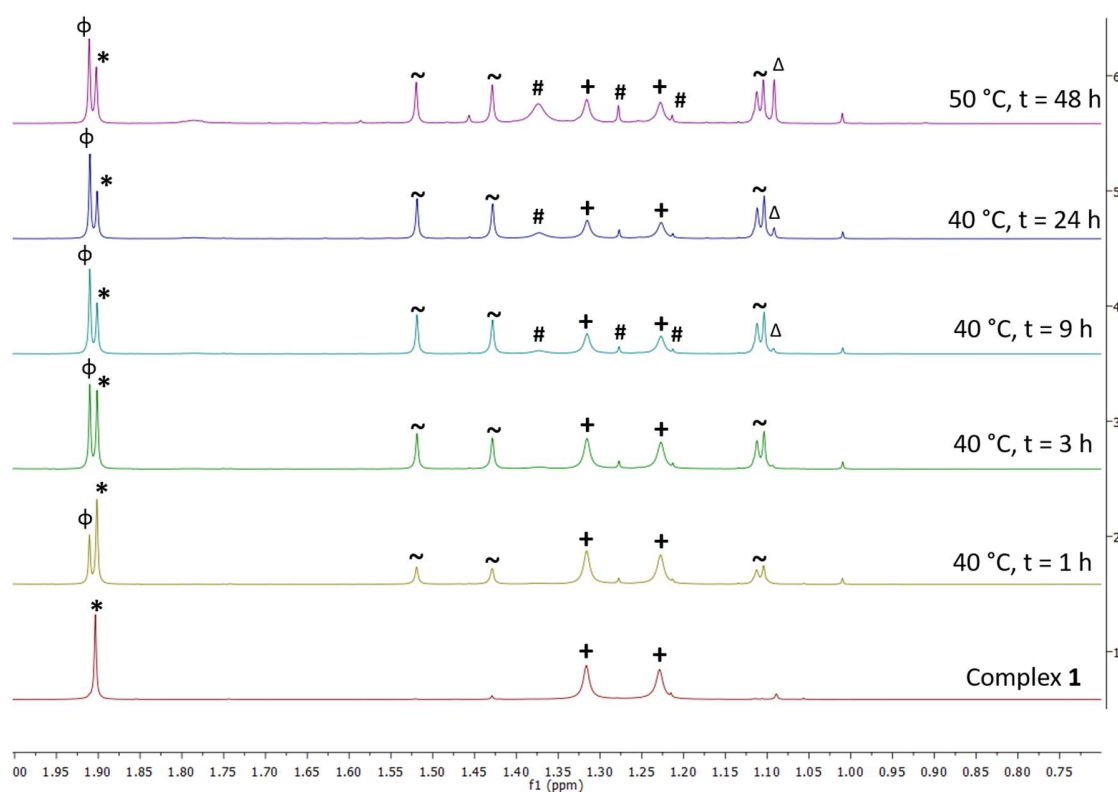

**Figure S10:** Stacked  $^1\text{H}$  NMR (400 MHz, 313 & 323 K,  $\text{C}_6\text{D}_6$ ) spectra of the aliphatic region for the conversion of isolated complex **1** to complex **2**. + =  $t\text{Bu}$  group of **1**, \* =  $\text{Cp}^*$  group of **1**, ~ =  $t\text{Bu}$  group of **2**,  $\phi$  =  $\text{Cp}^*$  group of **2**,  $\Delta$  =  $[\text{Cp}^*\text{Fe}(\eta^5\text{-P}_5)]$ , # = unidentified product(s).

## 4. Details of the simulation of the NMR spectra

Simulations of the  $^{31}\text{P}\{^1\text{H}\}$  NMR spectra were performed using the DAISY module of the Topspin 3.6 processing software (Bruker). The parameters chemical shift ( $\delta$ ), coupling constant ( $J$ ) and linewidth ( $\omega_{1/2}$ ) for the simulation of the phosphorus NMR spectra are compiled in the different tables.

### 4.1 Experimental and simulated spectra of **1** at 298 K

Two fragments were used for the simulation: complex **1** with a statistical weight of 1.000 and  $[\text{Cp}^*\text{Fe}(\eta^5\text{-P}_5)]$  (corresponding to the singlet at  $\delta$  151.65) with a statistical weight of 0.027.

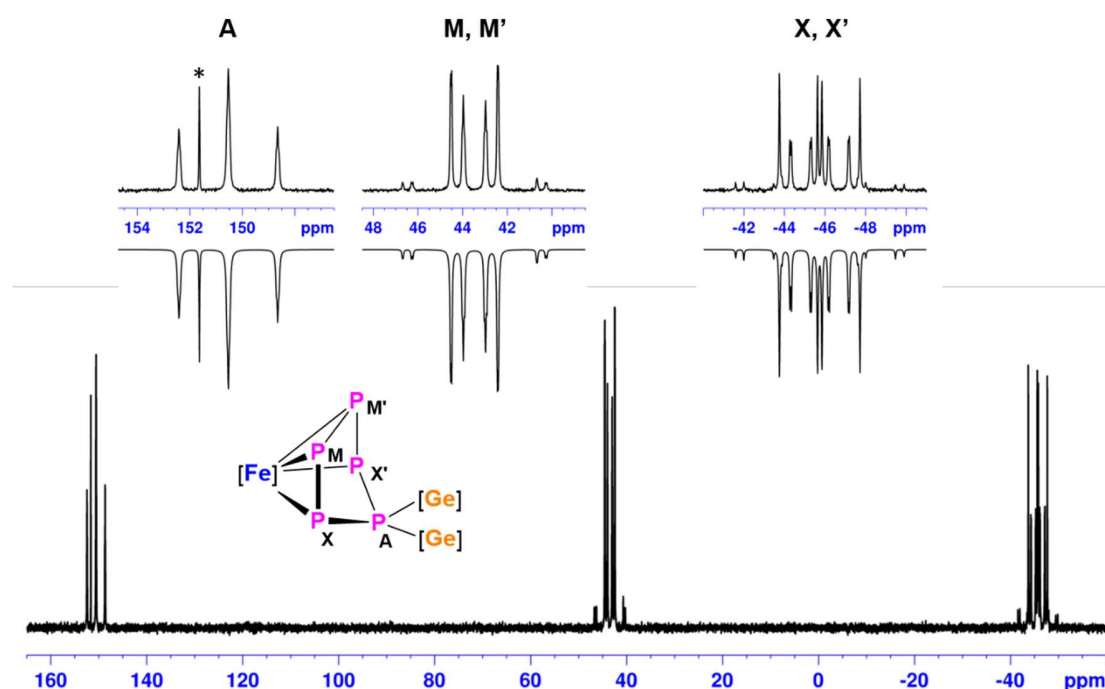

**Figure S11:**  $^{31}\text{P}\{^1\text{H}\}$  NMR spectrum at 298 K of complex **1** in  $\text{C}_6\text{D}_6$  with nuclei assigned to an  $\text{AMM}'\text{XX}'$  spin system; insets: extended signals (upwards) and simulations (downwards);  $\delta(\text{P}_A) = 150.5$  ppm,  $\delta(\text{P}_{\text{MM}'}) = 43.5$  ppm,  $\delta(\text{P}_{\text{XX}'}) = -45.7$  ppm,  $^1J_{\text{MM}'}$  = 406.8 Hz,  $^1J_{\text{MX}} = ^1J_{\text{M}'\text{X}'}$  = 367.2 Hz,  $^1J_{\text{AX}} = ^1J_{\text{AX}'}$  = 304.6 Hz,  $^2J_{\text{XX}'}$  = -39.0 Hz,  $^2J_{\text{MX}'} = ^2J_{\text{M}'\text{X}}$  = -27.9 Hz,  $^2J_{\text{AM}} = ^2J_{\text{AM}'}$  = 8.5 Hz,  $[\text{Fe}] = \text{Cp}^*\text{Fe}$ ,  $[\text{Ge}] = [\text{LGe}]$ . The singlet at  $\delta$  151.64 ppm (\*) corresponds to trace amounts of  $[\text{Cp}^*\text{Fe}(\eta^5\text{-P}_5)]$ .

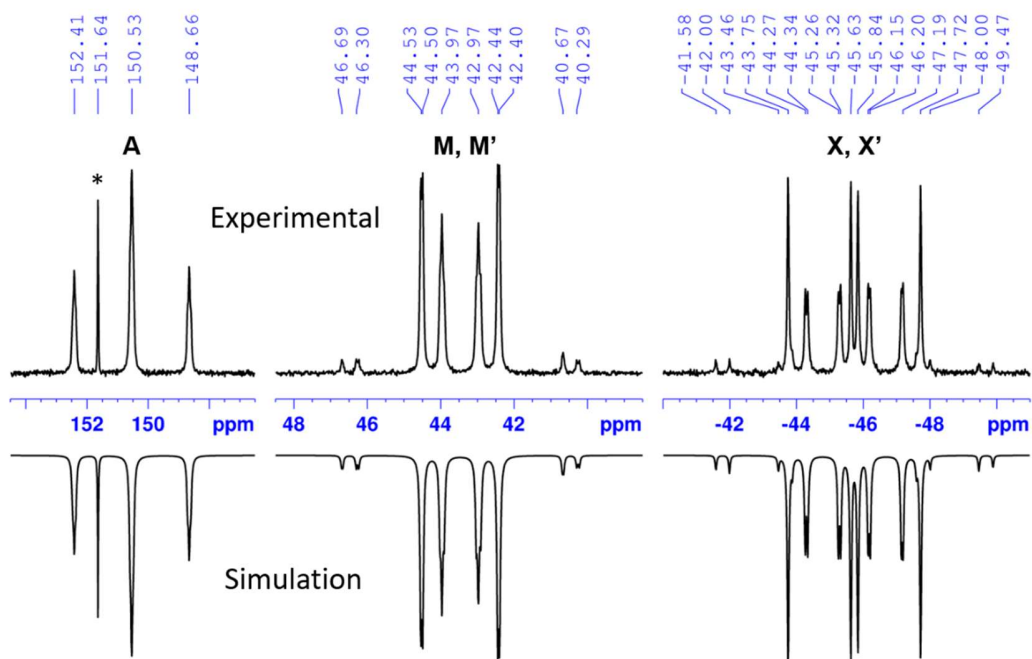

**Figure S12:** Section of the  $^{31}\text{P}\{^1\text{H}\}$  NMR spectrum (162.04 MHz, 298 K,  $\text{C}_6\text{D}_6$ ) of complex **1** with nuclei assigned to an AMM'XX' spin system; experimental (upwards) and simulation (downwards). The singlet at  $\delta$ 151.64 ppm (\*) corresponds to trace amounts of  $[\text{Cp}^*\text{Fe}(\eta^5\text{-P}_5)]$ .

**Table S1:** Chemical shifts, couplings constants and linewidths from the iterative fit of the AMM'XX' spin system of **1** in C<sub>6</sub>D<sub>6</sub> at 298 K and schematic representation of the FeP<sub>5</sub> core. [Fe] = Cp\*Fe, [Ge] = [LGe].

| Parameters                           | Iteration values |
|--------------------------------------|------------------|
| $\delta(P_A)$                        | 150.53 ppm       |
| $\delta(P_M) = \delta(P_{M'})$       | 43.46 ppm        |
| $\delta(P_X) = \delta(P_{X'})$       | -45.72 ppm       |
| $^1J_{MM'}$                          | 406.8 Hz         |
| $^1J_{MX} = ^1J_{M'X'}$              | 367.2 Hz         |
| $^1J_{AX} = ^1J_{AX'}$               | 304.6 Hz         |
| $^2J_{XX'}$                          | -39.0 Hz         |
| $^2J_{MX'} = ^2J_{M'X}$              | -27.9 Hz         |
| $^2J_{AM} = ^2J_{AM'}$               | 8.5 Hz           |
| $\omega_{1/2}(A)$                    | 9.6 Hz           |
| $\omega_{1/2}(M) = \omega_{1/2}(M')$ | 8.5 Hz           |
| $\omega_{1/2}(X) = \omega_{1/2}(X')$ | 8.7 Hz           |

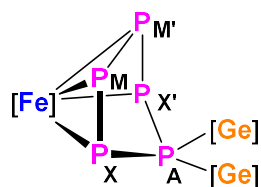

## 4.2 Experimental and simulated spectra of 2 at 298 K

Three fragments were used for the simulation: complex **2** (statistical weight of 1.00), complex **1** (statistical weight of 0.42) and  $[\text{Cp}^*\text{Fe}(\eta^5\text{-P}_5)]$  (singlet at  $\delta$  152.13 ppm, statistical weight of 0.38).

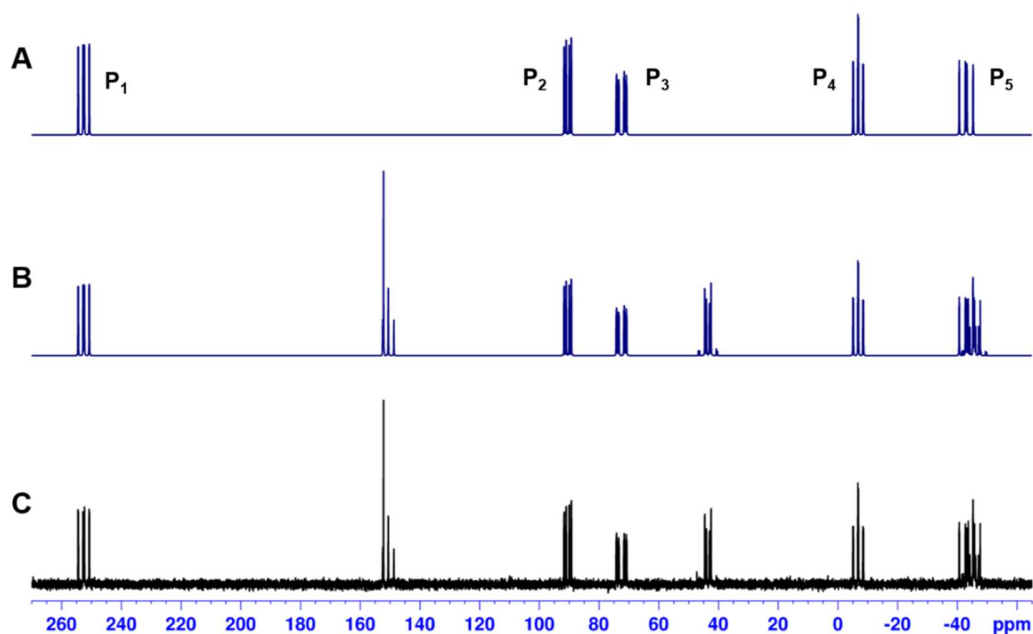

**Figure S13:**  $^{31}\text{P}\{^1\text{H}\}$  NMR spectrum at 298 K of the isomerization of complex **1** into complex **2** in  $\text{C}_6\text{D}_6$  recorded after the letting the NMR tube stand for *ca.* 1 month at room temperature. Part **A**: simulation spectrum showing only the complex **2**, part **B**: simulation spectrum showing all the species in solution (*i.e.* **2**, **1** and  $[\text{Cp}^*\text{Fe}(\eta^5\text{-P}_5)]$  with statistical weights of 1.00, 0.42 and 0.38, respectively), part **C**: experimental spectrum. The numbering  $\text{P}_1\text{-P}_5$  has been established arbitrarily and does not necessarily reflect the numbering on the X-ray structure.

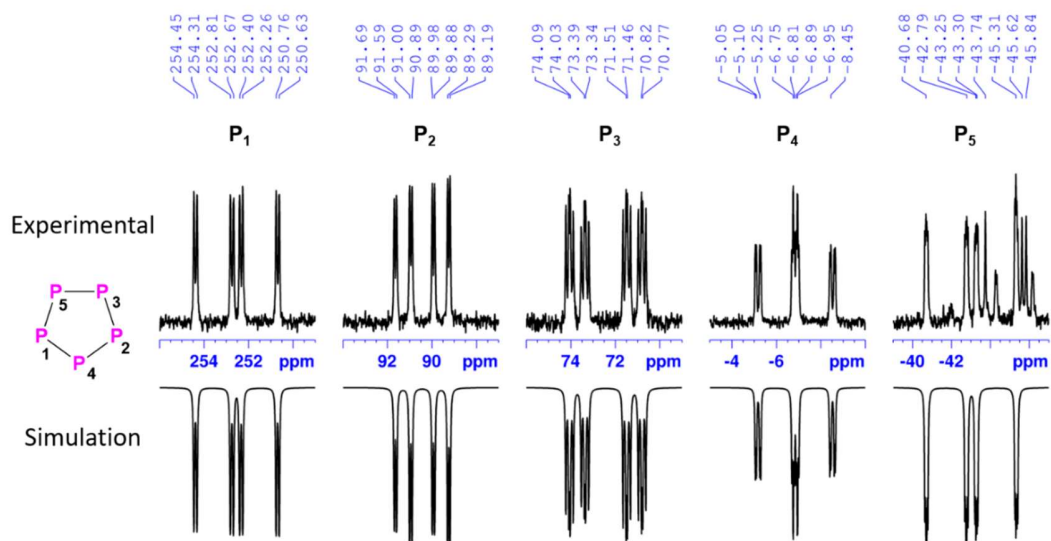

**Figure S14:** Sections of the  $^{31}\text{P}\{^1\text{H}\}$  NMR spectrum (162.06 MHz, 298 K,  $\text{C}_6\text{D}_6$ ) of complex **2** with assignment of the nuclei; experimental (upwards) and simulation (downwards). The numbering  $\text{P}_1$ - $\text{P}_5$  does not necessarily reflect the numbering on the X-ray structure.

**Table S2:** Chemical shifts, couplings constants and linewidths from the iterative fit of the P<sub>5</sub> spin system of **2** in C<sub>6</sub>D<sub>6</sub> at 298 K and schematic representation of the P<sub>5</sub> core. [Fe] = Cp\*Fe, [Ge] = [LGe]

| Parameters        | Iteration values | Parameters          | Iteration values |
|-------------------|------------------|---------------------|------------------|
| $\delta(P_1)$     | 252.54 ppm       | ${}^2J_{P_1-P_2}$   | -4.2 Hz          |
| $\delta(P_2)$     | 90.43 ppm        | ${}^2J_{P_1-P_3}$   | 22.1 Hz          |
| $\delta(P_3)$     | 72.42 ppm        | ${}^2J_{P_2-P_5}$   | 17.2 Hz          |
| $\delta(P_4)$     | -6.84 ppm        | ${}^2J_{P_3-P_4}$   | 31.9 Hz          |
| $\delta(P_5)$     | -43.01 ppm       | ${}^2J_{P_4-P_5}$   | 8.8 Hz           |
| ${}^1J_{P_1-P_4}$ | 265.7 Hz         | $\omega_{1/2}(P_1)$ | 6.4 Hz           |
| ${}^1J_{P_1-P_5}$ | 333.3 Hz         | $\omega_{1/2}(P_2)$ | 6.4 Hz           |
| ${}^1J_{P_2-P_3}$ | 112.1 Hz         | $\omega_{1/2}(P_3)$ | 7.4 Hz           |
| ${}^1J_{P_2-P_4}$ | 277.1 Hz         | $\omega_{1/2}(P_4)$ | 6.1 Hz           |
| ${}^1J_{P_3-P_5}$ | 416.2 Hz         | $\omega_{1/2}(P_5)$ | 7.3 Hz           |

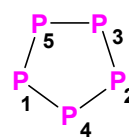



## 5. IR Spectrum of 1

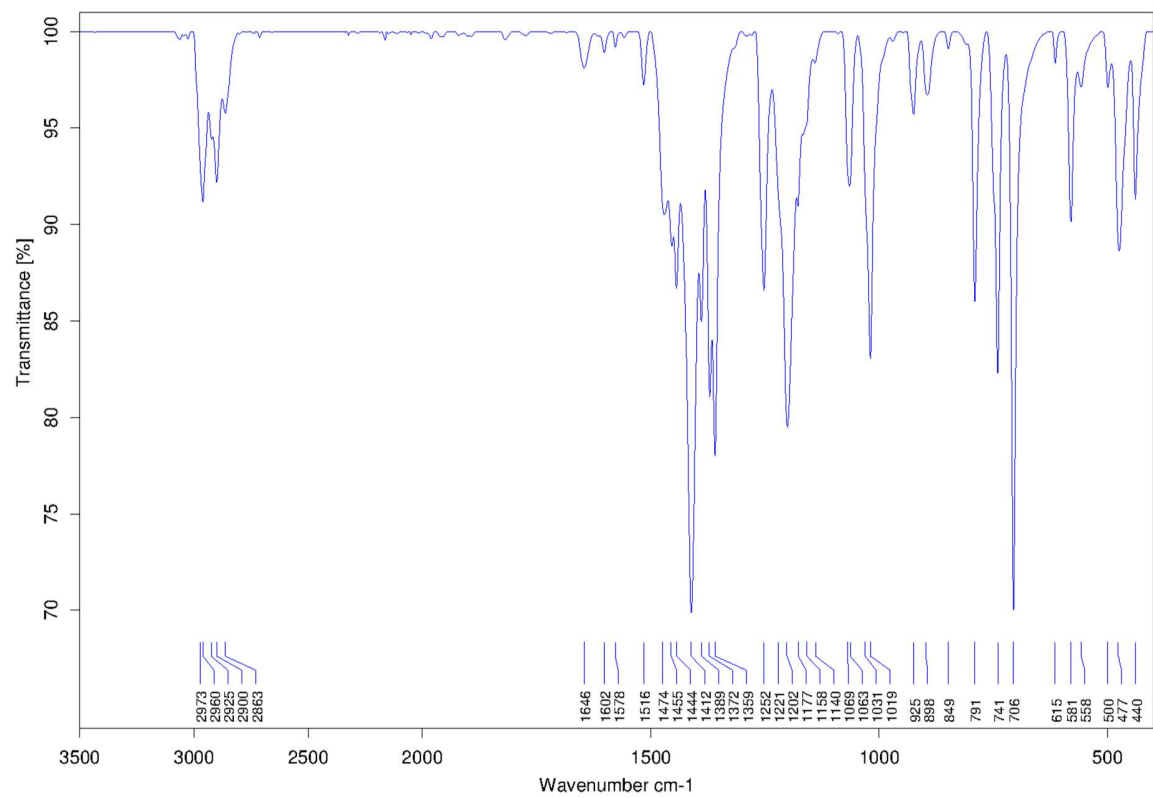

**Figure S15:** IR spectrum of complex 1.

## 6. Single crystal X-ray diffraction

A suitable crystal was covered in mineral oil (Aldrich) and mounted on a glass fiber. The crystal was transferred directly to the cold stream of a STOE IPDS 2 or a STOE StadiVari diffractometer. All structures were solved by using the program SHELXS/T<sup>4</sup> and Olex2.<sup>5</sup> The remaining non-hydrogen atoms were located from successive difference Fourier map calculations. The refinements were carried out by using full-matrix least-squares techniques on  $F^2$  by using the program SHELXL.<sup>4</sup> In each case, the locations of the largest peaks in the final difference Fourier map calculations, as well as the magnitude of the residual electron densities, were of no chemical significance.

Crystallographic data (excluding structure factors) for the structures reported in this paper have been deposited with the Cambridge Crystallographic Data Centre as a supplementary publication no. 2007825-2007826. Copies of the data can be obtained free of charge on application to CCDC, 12 Union Road, Cambridge CB21EZ, UK (fax: +(44)1223-336-033; email: [deposit@ccdc.cam.ac.uk](mailto:deposit@ccdc.cam.ac.uk)).

### Refinement details

The crystal structure of **1** contains one and a half molecules of toluene in the asymmetric unit. The half molecule could not be modeled satisfactorily and was therefore removed from the electron density map using the Olex2 solvent mask routine.<sup>5</sup> Also, the Cp\* moiety is strongly disordered and therefore only refined isotropically.

### 6.1. Table S3: Crystal data and structure refinement

| Compound                                       | 1*toluene                                                                       | 2*2(toluene)                                                                    |
|------------------------------------------------|---------------------------------------------------------------------------------|---------------------------------------------------------------------------------|
| Formula                                        | C <sub>47</sub> H <sub>69</sub> FeGe <sub>2</sub> N <sub>4</sub> P <sub>5</sub> | C <sub>54</sub> H <sub>77</sub> FeGe <sub>2</sub> N <sub>4</sub> P <sub>5</sub> |
| <i>D</i> <sub>calc.</sub> / g cm <sup>-3</sup> | 1.236                                                                           | 1.346                                                                           |
| $\mu$ /mm <sup>-1</sup>                        | 1.492                                                                           | 1.500                                                                           |
| Formula Weight                                 | 1045.94                                                                         | 1138.07                                                                         |
| Colour                                         | clear orange                                                                    | clear brown                                                                     |
| Shape                                          | plate                                                                           | plate                                                                           |
| Size/mm <sup>3</sup>                           | 0.23×0.14×0.03                                                                  | 0.33×0.20×0.07                                                                  |
| <i>T</i> /K                                    | 100                                                                             | 150                                                                             |
| Crystal System                                 | triclinic                                                                       | triclinic                                                                       |
| Space Group                                    | <i>P</i> -1                                                                     | <i>P</i> -1                                                                     |
| <i>a</i> /Å                                    | 12.9054(14)                                                                     | 12.1225(10)                                                                     |
| <i>b</i> /Å                                    | 13.5536(14)                                                                     | 14.174(2)                                                                       |
| <i>c</i> /Å                                    | 17.432(3)                                                                       | 16.7654(17)                                                                     |
| $\alpha$ /°                                    | 98.830(10)                                                                      | 84.679(10)                                                                      |
| $\beta$ /°                                     | 110.410(10)                                                                     | 79.665(7)                                                                       |
| $\gamma$ /°                                    | 92.274(9)                                                                       | 83.291(10)                                                                      |
| <i>V</i> /Å <sup>3</sup>                       | 2809.5(6)                                                                       | 2807.1(6)                                                                       |
| <i>Z</i>                                       | 2                                                                               | 2                                                                               |
| <i>Z'</i>                                      | 1                                                                               | 1                                                                               |
| Wavelength/Å                                   | 0.71073                                                                         | 0.71073                                                                         |
| Radiation type                                 | MoK $\alpha$                                                                    | MoK $\alpha$                                                                    |
| $\theta$ <sub>min</sub> /°                     | 1.711                                                                           | 1.717                                                                           |
| $\theta$ <sub>max</sub> /°                     | 31.153                                                                          | 29.504                                                                          |
| Measured Refl.                                 | 26911                                                                           | 28119                                                                           |
| Independent Refl.                              | 14041                                                                           | 15293                                                                           |
| Reflections with <i>I</i> > 2( <i>I</i> )      | 8228                                                                            | 9972                                                                            |
| <i>R</i> <sub>int</sub>                        | 0.0493                                                                          | 0.0387                                                                          |
| Parameters                                     | 591                                                                             | 742                                                                             |
| Restraints                                     | 468                                                                             | 468                                                                             |
| Largest Peak                                   | 0.924                                                                           | 0.767                                                                           |
| Deepest Hole                                   | -0.964                                                                          | -0.427                                                                          |
| GooF                                           | 1.030                                                                           | 1.016                                                                           |
| <i>wR</i> <sub>2</sub> (all data)              | 0.1873                                                                          | 0.0854                                                                          |
| <i>wR</i> <sub>2</sub>                         | 0.1597                                                                          | 0.0748                                                                          |
| <i>R</i> <sub>1</sub> (all data)               | 0.1253                                                                          | 0.0834                                                                          |
| <i>R</i> <sub>1</sub>                          | 0.0679                                                                          | 0.0396                                                                          |

## 6.2. Crystal structures

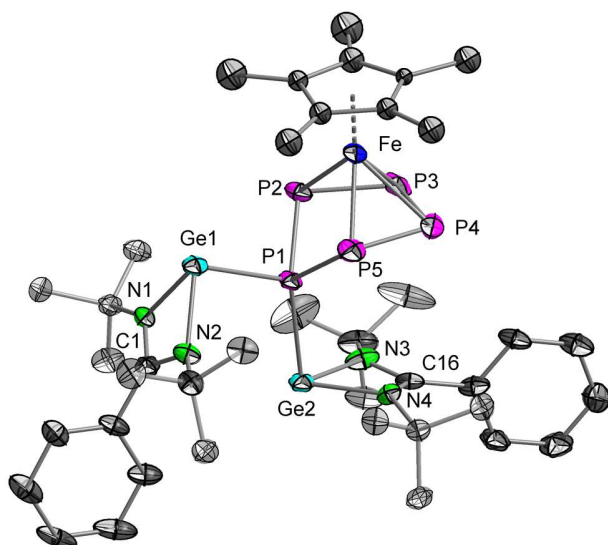

**Figure S16:** The molecular structure of complex **1** in the solid state with thermal ellipsoids at 40% probability. The hydrogen atoms and the solvent molecule in the unit cell are omitted for clarity. Selected bond distances (Å) and angles [°]: Ge1-P1 2.4394(14), Ge1-N2 2.020(4), Ge1-N1 2.040(4), Ge2-P1 2.4978(13), Ge2-N3 2.016(4), Ge2-N4 2.010(4), Fe-P2 2.311(2), Fe-P3 2.357(2), Fe-P4 2.339(2), Fe-P5 2.321(2), P1-P2 2.196(2), P2-P3 2.152(3), P3-P4 2.159(3), P4-P5 2.176(2), P5-P1 2.209(2), N3-C16 1.350(6), N2-C1 1.348(6), N1-C1 1.354(6); Ge1-P1-Ge2 114.28(5), N2-Ge1-P1 95.61(12), N2-Ge1-N1 65.1(2), N1-Ge1-P1 94.57(12), N3-Ge2-P1 95.80(11), N4-Ge2-P1 97.36(12), N4-Ge2-N3 65.4(2).

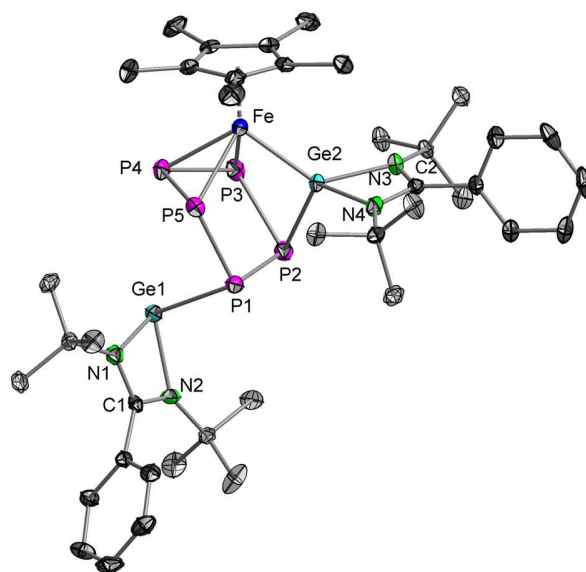

**Figure S17:** The molecular structure of complex **2** in the solid state with thermal ellipsoids at 40% probability. The hydrogen atoms and the solvent molecule in the unit cell are omitted for clarity. Selected bond distances (Å) and angles [°]: Ge1-P1 2.4286(7), Ge1-N1 2.020(2), Ge1-N2 2.030(2), Ge2-Fe 2.2768(5), Ge2-P2 2.3142(7), Ge2-P3 2.7938(7), Ge2-N3 1.995(2), Ge2-N4 2.002(2), Fe-P3 2.3934(8), Fe-P4 2.3404(7), Fe-P5 2.3318(8), P1-P2 2.1875(10), P2-P3 2.3208(11), P3-P4 2.1195(10), P4-P5 2.1584(10), P5-P1 2.2153(10), N1-C1 1.324(3), N2-C1 1.330(3), N3-C2 1.326(3), N4-C2 1.329(3); N1-Ge1-P1 96.49(6), N1-Ge1-N2 64.58(8), N2-Ge1-P1 95.23(6), Fe-Ge2-P2 100.73(2), Fe-Ge2-P3 55.20(2), P2-Ge2-P3 53.04(2), N3-Ge2-Fe 131.92(6), N3-Ge2-P2 117.13(6), N3-Ge2-P3 170.14(6), N3-Ge2-N4 65.81(8), N4-Ge2-Fe 130.32(6), N4-Ge2-P2 108.14(6), N4-Ge2-P3 116.09(6), Ge2-Fe-P3 73.44(2), Ge2-Fe-P4 110.88(3), Ge2-Fe-P5 85.13(2).

## 7. References

1. O. J. Scherer and T. Brück, *Angew. Chem. Int. Ed.*, 1987, **26**, 59.
2. M. V. Butovskiy, G. Balázs, M. Bodensteiner, E. V. Peresykina, A. V. Virovets, J. Sutter and M. Scheer, *Angew. Chem. Int. Ed.*, 2013, **52**, 2972.
3. S. Nagendran, S. S. Sen, H. W. Roesky, D. Koley, H. Grubmüller, A. Pal and R. Herbst-Irmer, *Organometallics*, 2008, **27**, 5459.
4. (a) G. Sheldrick, *Acta Crystallogr., Sect. A*, 2008, **64**, 112; (b) G. Sheldrick, *Acta Crystallogr., Sect. C*, 2015, **71**, 3.
5. O. V. Dolomanov, L. J. Bourhis, R. J. Gildea, J. A. K. Howard and H. Puschmann, *J. Appl. Cryst.*, 2009, **42**, 339.
